# Supplementary material
Source: PubMed Central journal article supplement (PMC556264)

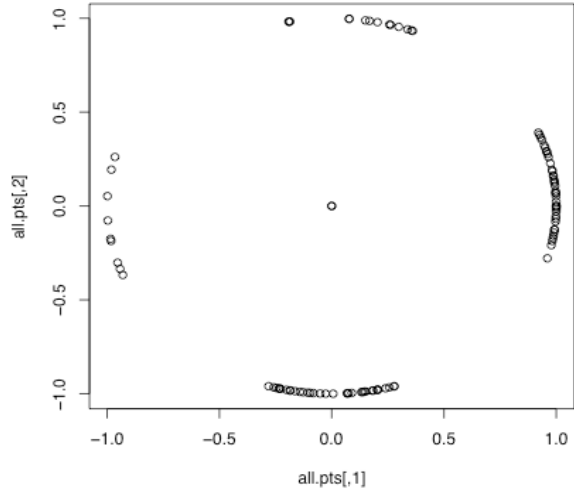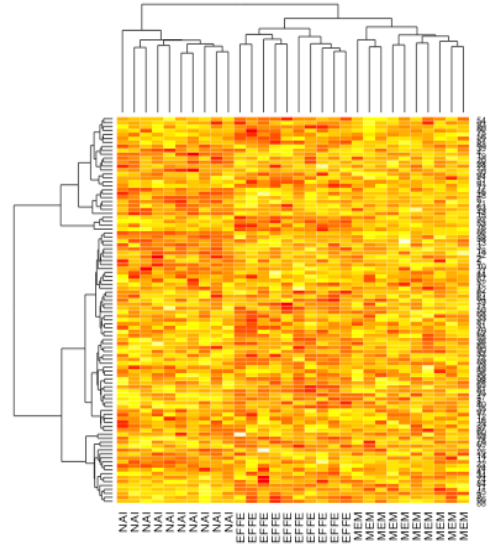

Supplement: pnas_102_15_5519__7.pdf [file pnas_102_15_5519__7.pdf]
